# Supplementary material
Source: PubMed Central journal article supplement (PMC6288334)
Supplement: 3b3082be6330acb2493395b3155cba7e_JVI.01476-18-s0001.pdf [file 3b3082be6330acb2493395b3155cba7e_JVI.01476-18-s0001.pdf]

Table S1. GenBank accession numbers for rotavirus genome sequences analyzed.

A. Sequences from the current study

| Strain name                               | Encoded protein (genome segment) |          |          |          |          |          |          |          |          |           |             |
|-------------------------------------------|----------------------------------|----------|----------|----------|----------|----------|----------|----------|----------|-----------|-------------|
|                                           | VP7 (9)                          | VP4 (4)  | VP6 (6)  | VP1 (1)  | VP2 (2)  | VP3 (3)  | NSP1 (5) | NSP2 (8) | NSP3 (7) | NSP4 (10) | NSP5/6 (11) |
| RVA/Human-wt/USA/VU11-12-54/2012/G12P[8]  | KT919320                         | KT919318 | KT919319 | KT919315 | KT919316 | KT919317 | KT919310 | KT919311 | KT919312 | KT919313  | KT919314    |
| RVA/Human-wt/USA/VU11-12-58/2012/G12P[8]  | KT919486                         | KT919484 | KT919485 | KT919481 | KT919482 | KT919483 | KT919476 | KT919477 | KT919478 | KT919479  | KT919480    |
| RVA/Human-wt/USA/VU11-12-59/2012/G12P[8]  | KT918913                         | KT918911 | KT918912 | KT918908 | KT918909 | KT918910 | KT918903 | KT918904 | KT918905 | KT918906  | KT918907    |
| RVA/Human-wt/USA/VU11-12-60/2012/G3P[8]   | KT919067                         | KT919065 | KT919066 | KT919062 | KT919063 | KT919064 | KT919057 | KT919058 | KT919059 | KT919060  | KT919061    |
| RVA/Human-wt/USA/VU11-12-62/2012/G12P[8]  | KT918616                         | KT918614 | KT918615 | KT918611 | KT918612 | KT918613 | KT918606 | KT918607 | KT918608 | KT918609  | KT918610    |
| RVA/Human-wt/USA/VU11-12-64/2012/G12P[8]  | KT919331                         | KT919329 | KT919330 | KT919326 | KT919327 | KT919328 | KT919321 | KT919322 | KT919323 | KT919324  | KT919325    |
| RVA/Human-wt/USA/VU11-12-65/2012/G12P[8]  | KT919144                         | KT919142 | KT919143 | KT919139 | KT919140 | KT919141 | KT919134 | KT919135 | KT919136 | KT919137  | KT919138    |
| RVA/Human-wt/USA/VU11-12-66/2012/G12P[8]  | KT919386                         | KT919384 | KT919385 | KT919381 | KT919382 | KT919383 | KT919376 | KT919377 | KT919378 | KT919379  | KT919380    |
| RVA/Human-wt/USA/VU11-12-67/2012/G12P[8]  | KT919772                         | KT919770 | KT919771 | KT919767 | KT919768 | KT919769 | KT919762 | KT919763 | KT919764 | KT919765  | KT919766    |
| RVA/Human-wt/USA/VU11-12-68/2012/G12P[8]  | KT918440                         | KT918438 | KT918439 | KT918435 | KT918436 | KT918437 | KT918430 | KT918431 | KT918432 | KT918433  | KT918434    |
| RVA/Human-wt/USA/VU11-12-69/2012/G12P[8]  | KT919860                         | KT919858 | KT919859 | KT919855 | KT919856 | KT919857 | KT919850 | KT919851 | KT919852 | KT919853  | KT919854    |
| RVA/Human-wt/USA/VU11-12-70/2012/G12P[8]  | KT919475                         | KT919473 | KT919474 | KT919470 | KT919471 | KT919472 | KT919465 | KT919466 | KT919467 | KT919468  | KT919469    |
| RVA/Human-wt/USA/VU11-12-71/2012/G12P[8]  | KT918693                         | KT918691 | KT918692 | KT918688 | KT918689 | KT918690 | KT918683 | KT918684 | KT918685 | KT918686  | KT918687    |
| RVA/Human-wt/USA/VU11-12-192/2012/G12P[8] | KT918737                         | KT918735 | KT918736 | KT918732 | KT918733 | KT918734 | KT918727 | KT918728 | KT918729 | KT918730  | KT918731    |
| RVA/Human-wt/USA/VU11-12-194/2012/G12P[8] | KT919012                         | KT919010 | KT919011 | KT919007 | KT919008 | KT919009 | KT919002 | KT919003 | KT919004 | KT919005  | KT919006    |
| RVA/Human-wt/USA/VU11-12-195/2012/G12P[8] | KT919023                         | KT919021 | KT919022 | KT919018 | KT919019 | KT919020 | KT919013 | KT919014 | KT919015 | KT919016  | KT919017    |
| RVA/Human-wt/USA/VU12-13-3/2012/G12P[8]   | KT919177                         | KT919175 | KT919176 | KT919172 | KT919173 | KT919174 | KT919167 | KT919168 | KT919169 | KT919170  | KT919171    |
| RVA/Human-wt/USA/VU12-13-4/2013/G12P[8]   | KT919926                         | KT919924 | KT919925 | KT919921 | KT919922 | KT919923 | KT919916 | KT919917 | KT919918 | KT919919  | KT919920    |
| RVA/Human-wt/USA/VU12-13-6/2013/G12P[8]   | KT919188                         | KT919186 | KT919187 | KT919183 | KT919184 | KT919185 | KT919178 | KT919179 | KT919180 | KT919181  | KT919182    |
| RVA/Human-wt/USA/VU12-13-7/2013/G12P[8]   | KT919232                         | KT919230 | KT919231 | KT919227 | KT919228 | KT919229 | KT919222 | KT919223 | KT919224 | KT919225  | KT919226    |
| RVA/Human-wt/USA/VU12-13-8/2013/G12P[8]   | KT919794                         | KT919792 | KT919793 | KT919789 | KT919790 | KT919791 | KT919784 | KT919785 | KT919786 | KT919787  | KT919788    |
| RVA/Human-wt/USA/VU12-13-9/2013/G12P[8]   | KT919849                         | KT919847 | KT919848 | KT919844 | KT919845 | KT919846 | KT919839 | KT919840 | KT919841 | KT919842  | KT919843    |
| RVA/Human-wt/USA/VU12-13-10/2013/G12P[8]  | KT919673                         | KT919671 | KT919672 | KT919668 | KT919669 | KT919670 | KT919663 | KT919664 | KT919665 | KT919666  | KT919667    |
| RVA/Human-wt/USA/VU12-13-11/2013/G12P[8]  | KT918990                         | KT918988 | KT918989 | KT918985 | KT918986 | KT918987 | KT918980 | KT918981 | KT918982 | KT918983  | KT918984    |
| RVA/Human-wt/USA/VU12-13-12/2013/G12P[8]  | KT919783                         | KT919781 | KT919782 | KT919778 | KT919779 | KT919780 | KT919773 | KT919774 | KT919775 | KT919776  | KT919777    |
| RVA/Human-wt/USA/VU12-13-13/2013/G12P[8]  | KT919078                         | KT919076 | KT919077 | KT919073 | KT919074 | KT919075 | KT919068 | KT919069 | KT919070 | KT919071  | KT919072    |
| RVA/Human-wt/USA/VU12-13-15/2013/G12P[8]  | KT919838                         | KT919836 | KT919837 | KT919833 | KT919834 | KT919835 | KT919828 | KT919829 | KT919830 | KT919831  | KT919832    |
| RVA/Human-wt/USA/VU12-13-16/2013/G12P[8]  | KT918649                         | KT918647 | KT918648 | KT918644 | KT918645 | KT918646 | KT918639 | KT918640 | KT918641 | KT918642  | KT918643    |
| RVA/Human-wt/USA/VU12-13-18/2013/G12P[8]  | KT919430                         | KT919428 | KT919429 | KT919425 | KT919426 | KT919427 | KT919420 | KT919421 | KT919422 | KT919423  | KT919424    |
| RVA/Human-wt/USA/VU12-13-20/2013/G12P[8]  | KT918572                         | KT918570 | KT918571 | KT918567 | KT918568 | KT918569 | KT918562 | KT918563 | KT918564 | KT918565  | KT918566    |
| RVA/Human-wt/USA/VU12-13-21/2013/G12P[8]  | KT919574                         | KT919572 | KT919573 | KT919569 | KT919570 | KT919571 | KT919564 | KT919565 | KT919566 | KT919567  | KT919568    |
| RVA/Human-wt/USA/VU12-13-22/2013/G12P[8]  | KT919717                         | KT919715 | KT919716 | KT919712 | KT919713 | KT919714 | KT919707 | KT919708 | KT919709 | KT919710  | KT919711    |
| RVA/Human-wt/USA/VU12-13-23/2013/G12P[8]  | KT919596                         | KT919594 | KT919595 | KT919591 | KT919592 | KT919593 | KT919586 | KT919587 | KT919588 | KT919589  | KT919590    |
| RVA/Human-wt/USA/VU12-13-24/2013/G12P[8]  | KT919034                         | KT919032 | KT919033 | KT919029 | KT919030 | KT919031 | KT919024 | KT919025 | KT919026 | KT919027  | KT919028    |
| RVA/Human-wt/USA/VU12-13-25/2013/G12P[8]  | KT918594                         | KT918592 | KT918593 | KT918589 | KT918590 | KT918591 | KT918584 | KT918585 | KT918586 | KT918587  | KT918588    |
| RVA/Human-wt/USA/VU12-13-26/2013/G2P[4]   | KT918847                         | KT918845 | KT918846 | KT918842 | KT918843 | KT918844 | KT918837 | KT918838 | KT918839 | KT918840  | KT918841    |
| RVA/Human-wt/USA/VU12-13-28/2013/G12P[8]  | KT918429                         | KT918427 | KT918428 | KT918424 | KT918425 | KT918426 | KT918419 | KT918420 | KT918421 | KT918422  | KT918423    |
| RVA/Human-wt/USA/VU12-13-29/2013/G12P[8]  | KT919375                         | KT919373 | KT919374 | KT919370 | KT919371 | KT919372 | KT919365 | KT919366 | KT919367 | KT919368  | KT919369    |
| RVA/Human-wt/USA/VU12-13-31/2013/G12P[8]  | KT919497                         | KT919495 | KT919496 | KT919492 | KT919493 | KT919494 | KT919487 | KT919488 | KT919489 | KT919490  | KT919491    |
| RVA/Human-wt/USA/VU12-13-32/2013/G12P[8]  | KT919618                         | KT919616 | KT919617 | KT919613 | KT919614 | KT919615 | KT919608 | KT919609 | KT919610 | KT919611  | KT919612    |
| RVA/Human-wt/USA/VU12-13-33/2013/G12P[8]  | KT918506                         | KT918504 | KT918505 | KT918501 | KT918502 | KT918503 | KT918496 | KT918497 | KT918498 | KT918499  | KT918500    |
| RVA/Human-wt/USA/VU12-13-34/2013/G12P[8]  | KT919662                         | KT919660 | KT919661 | KT919657 | KT919658 | KT919659 | KT919652 | KT919653 | KT919654 | KT919655  | KT919656    |
| RVA/Human-wt/USA/VU12-13-35/2013/G12P[8]  | KT919541                         | KT919539 | KT919540 | KT919536 | KT919537 | KT919538 | KT919531 | KT919532 | KT919533 | KT919534  | KT919535    |
| RVA/Human-wt/USA/VU12-13-36/2013/G12P[8]  | KT919871                         | KT919869 | KT919870 | KT919866 | KT919867 | KT919868 | KT919861 | KT919862 | KT919863 | KT919864  | KT919865    |
| RVA/Human-wt/USA/VU12-13-37/2013/G12P[8]  | KT919904                         | KT919902 | KT919903 | KT919899 | KT919900 | KT919901 | KT919894 | KT919895 | KT919896 | KT919897  | KT919898    |
| RVA/Human-wt/USA/VU12-13-38/2013/G12P[8]  | KT918825                         | KT918823 | KT918824 | KT918820 | KT918821 | KT918822 | KT918815 | KT918816 | KT918817 | KT918818  | KT918819    |
| RVA/Human-wt/USA/VU12-13-39/2013/G12P[8]  | KT919364                         | KT919362 | KT919363 | KT919359 | KT919360 | KT919361 | KT919354 | KT919355 | KT919356 | KT919357  | KT919358    |
| RVA/Human-wt/USA/VU12-13-40/2013/G12P[8]  | KT919408                         | KT919406 | KT919407 | KT919403 | KT919404 | KT919405 | KT919398 | KT919399 | KT919400 | KT919401  | KT919402    |
| RVA/Human-wt/USA/VU12-13-41/2013/G12P[8]  | KT919607                         | KT919605 | KT919606 | KT919602 | KT919603 | KT919604 | KT919597 | KT919598 | KT919599 | KT919600  | KT919601    |
| RVA/Human-wt/USA/VU12-13-73/2012/G12P[8]  | KT918792                         | KT918790 | KT918791 | KT918787 | KT918788 | KT918789 | KT918782 | KT918783 | KT918784 | KT918785  | KT918786    |
| RVA/Human-wt/USA/VU12-13-74/2012/G12P[8]  | KT918781                         | KT918779 | KT918780 | KT918776 | KT918777 | KT918778 | KT918771 | KT918772 | KT918773 | KT918774  | KT918775    |
| RVA/Human-wt/USA/VU12-13-75/2012/G12P[8]  | KT918495                         | KT918493 | KT918494 | KT918490 | KT918491 | KT918492 | KT918485 | KT918486 | KT918487 | KT918488  | KT918489    |
| RVA/Human-wt/USA/VU12-13-76/2012/G12P[8]  | KT919254                         | KT919252 | KT919253 | KT919249 | KT919250 | KT919251 | KT919244 | KT919245 | KT919246 | KT919247  | KT919248    |
| RVA/Human-wt/USA/VU12-13-77/2012/G12P[8]  | KT918539                         | KT918537 | KT918538 | KT918534 | KT918535 | KT918536 | KT918529 | KT918530 | KT918531 | KT918532  | KT918533    |
| RVA/Human-wt/USA/VU12-13-78/2012/G12P[8]  | KT919353                         | KT919351 | KT919352 | KT919348 | KT919349 | KT919350 | KT919343 | KT919344 | KT919345 | KT919346  | KT919347    |
| RVA/Human-wt/USA/VU12-13-79/2012/G12P[8]  | KT918836                         | KT918834 | KT918835 | KT918831 | KT918832 | KT918833 | KT918826 | KT918827 | KT918828 | KT918829  | KT918830    |
| RVA/Human-wt/USA/VU12-13-80/2012/G12P[8]  | KT919155                         | KT919153 | KT919154 | KT919150 | KT919151 | KT919152 | KT919145 | KT919146 | KT919147 | KT919148  | KT919149    |
| RVA/Human-wt/USA/VU12-13-81/2013/G12P[8]  | KT918638                         | KT918636 | KT918637 | KT918633 | KT918634 | KT918635 | KT918628 | KT918629 | KT918630 | KT918631  | KT918632    |
| RVA/Human-wt/USA/VU12-13-82/2013/G12P[8]  | KT919298                         | KT919296 | KT919297 | KT919293 | KT919294 | KT919295 | KT919288 | KT919289 | KT919290 | KT919291  | KT919292    |
| RVA/Human-wt/USA/VU12-13-83/2013/G12P[8]  | KT919750                         | KT919748 | KT919749 | KT919745 | KT919746 | KT919747 | KT919740 | KT919741 | KT919742 | KT919743  | KT919744    |
| RVA/Human-wt/USA/VU12-13-84/2013/G12P[8]  | KT919948                         | KT919946 | KT919947 | KT919943 | KT919944 | KT919945 | KT919938 | KT919939 | KT919940 | KT919941  | KT919942    |
| RVA/Human-wt/USA/VU12-13-85/2013/G12P[8]  | KT918462                         | KT918460 | KT918461 | KT918457 | KT918458 | KT918459 | KT918452 | KT918453 | KT918454 | KT918455  | KT918456    |
| RVA/Human-wt/USA/VU12-13-86/2013/G12P[8]  | KT918946                         | KT918944 | KT918945 | KT918941 | KT918942 | KT918943 | KT918936 | KT918937 | KT918938 | KT918939  | KT918940    |
| RVA/Human-wt/USA/VU12-13-87/2013/G12P[8]  | KT919684                         | KT919682 | KT919683 | KT919679 | KT919680 | KT919681 | KT919674 | KT919675 | KT919676 | KT919677  | KT919678    |
| RVA/Human-wt/USA/VU12-13-88/2013/G12P[8]  | KT918902                         | KT918900 | KT918901 | KT918897 | KT918898 | KT918899 | KT918892 | KT918893 | KT918894 | KT918895  | KT918896    |
| RVA/Human-wt/USA/VU12-13-89/2013/G12P[8]  | KT919166                         | KT919164 | KT919165 | KT919161 | KT919162 | KT919163 | KT919156 | KT919157 | KT919158 | KT919159  | KT919160    |
| RVA/Human-wt/USA/VU12-13-90/2013/G12P[8]  | KT918803                         | KT918801 | KT918802 | KT918798 | KT918799 | KT918800 | KT918793 | KT918794 | KT918795 | KT918796  | KT918797    |
| RVA/Human-wt/USA/VU12-13-91/2013/G12P[8]  | KT918924                         | KT918922 | KT918923 | KT918919 | KT918920 | KT918921 | KT918914 | KT918915 | KT918916 | KT918917  | KT918918    |
| RVA/Human-wt/USA/VU12-13-93/2013/G12P[8]  | KT919761                         | KT919759 | KT919760 | KT919756 | KT919757 | KT919758 | KT919751 | KT919752 | KT919753 | KT919754  | KT919755    |
| RVA/Human-wt/USA/VU12-13-94/2013/G12P[8]  | KT918671                         | KT918669 | KT918670 | KT918666 | KT918667 | KT918668 | KT918661 | KT918662 | KT918663 | KT918664  | KT918665    |
| RVA/Human-wt/USA/VU12-13-95/2013/G12P[8]  | KT919640                         | KT919638 | KT919639 | KT919635 | KT919636 | KT919637 | KT919630 | KT919631 | KT919632 | KT919633  | KT919634    |
| RVA/Human-wt/USA/VU12-13-96/2             |                                  |          |          |          |          |          |          |          |          |           |             |

|                                           |          |          |          |          |          |          |          |          |          |          |          |
|-------------------------------------------|----------|----------|----------|----------|----------|----------|----------|----------|----------|----------|----------|
| RVA/Human-wt/USA/VU12-13-107/2013/G12P[8] | KT919827 | KT919825 | KT919826 | KT919822 | KT919823 | KT919824 | KT919817 | KT919818 | KT919819 | KT919820 | KT919821 |
| RVA/Human-wt/USA/VU12-13-108/2013/G12P[8] | KT919970 | KT919968 | KT919969 | KT919965 | KT919966 | KT919967 | KT919960 | KT919961 | KT919962 | KT919963 | KT919964 |
| RVA/Human-wt/USA/VU12-13-109/2013/G12P[8] | KT918891 | KT918889 | KT918890 | KT918886 | KT918887 | KT918888 | KT918881 | KT918882 | KT918883 | KT918884 | KT918885 |
| RVA/Human-wt/USA/VU12-13-110/2013/G12P[8] | KT918968 | KT918966 | KT918967 | KT918963 | KT918964 | KT918965 | KT918958 | KT918959 | KT918960 | KT918961 | KT918962 |
| RVA/Human-wt/USA/VU12-13-111/2013/G12P[8] | KT919397 | KT919395 | KT919396 | KT919392 | KT919393 | KT919394 | KT919387 | KT919388 | KT919389 | KT919390 | KT919391 |
| RVA/Human-wt/USA/VU12-13-112/2013/G12P[8] | KT919265 | KT919263 | KT919264 | KT919260 | KT919261 | KT919262 | KT919255 | KT919256 | KT919257 | KT919258 | KT919259 |
| RVA/Human-wt/USA/VU12-13-113/2013/G12P[8] | KT919001 | KT918999 | KT919000 | KT918996 | KT918997 | KT918998 | KT918991 | KT918992 | KT918993 | KT918994 | KT918995 |
| RVA/Human-wt/USA/VU12-13-114/2013/G12P[8] | KT918561 | KT918559 | KT918560 | KT918556 | KT918557 | KT918558 | KT918551 | KT918552 | KT918553 | KT918554 | KT918555 |
| RVA/Human-wt/USA/VU12-13-115/2013/G12P[8] | KT919465 | KT919463 | KT919464 | KT919460 | KT919461 | KT919462 | KT919455 | KT919456 | KT919457 | KT919458 | KT919459 |
| RVA/Human-wt/USA/VU12-13-116/2013/G12P[8] | KT918770 | KT918768 | KT918769 | KT918765 | KT918766 | KT918767 | KT918760 | KT918761 | KT918762 | KT918763 | KT918764 |
| RVA/Human-wt/USA/VU12-13-117/2013/G12P[8] | KT918682 | KT918680 | KT918681 | KT918677 | KT918678 | KT918679 | KT918672 | KT918673 | KT918674 | KT918675 | KT918676 |
| RVA/Human-wt/USA/VU12-13-118/2013/G12P[8] | KT918869 | KT918867 | KT918868 | KT918864 | KT918865 | KT918866 | KT918859 | KT918860 | KT918861 | KT918862 | KT918863 |
| RVA/Human-wt/USA/VU12-13-119/2013/G12P[8] | KT919552 | KT919550 | KT919551 | KT919547 | KT919548 | KT919549 | KT919542 | KT919543 | KT919544 | KT919545 | KT919546 |
| RVA/Human-wt/USA/VU12-13-120/2013/G12P[8] | KT919530 | KT919528 | KT919529 | KT919525 | KT919526 | KT919527 | KT919520 | KT919521 | KT919522 | KT919523 | KT919524 |
| RVA/Human-wt/USA/VU12-13-121/2013/G12P[8] | KT918528 | KT918526 | KT918527 | KT918523 | KT918524 | KT918525 | KT918518 | KT918519 | KT918520 | KT918521 | KT918522 |
| RVA/Human-wt/USA/VU12-13-122/2013/G12P[8] | KT918748 | KT918746 | KT918747 | KT918743 | KT918744 | KT918745 | KT918738 | KT918739 | KT918740 | KT918741 | KT918742 |
| RVA/Human-wt/USA/VU12-13-123/2013/G12P[8] | KT918814 | KT918812 | KT918813 | KT918809 | KT918810 | KT918811 | KT918804 | KT918805 | KT918806 | KT918807 | KT918808 |
| RVA/Human-wt/USA/VU12-13-124/2013/G12P[8] | KT919563 | KT919561 | KT919562 | KT919558 | KT919559 | KT919560 | KT919553 | KT919554 | KT919555 | KT919556 | KT919557 |
| RVA/Human-wt/USA/VU12-13-125/2013/G12P[8] | KT919221 | KT919219 | KT919220 | KT919216 | KT919217 | KT919218 | KT919211 | KT919212 | KT919213 | KT919214 | KT919215 |
| RVA/Human-wt/USA/VU12-13-126/2013/G12P[8] | KT919309 | KT919307 | KT919308 | KT919304 | KT919305 | KT919306 | KT919299 | KT919300 | KT919301 | KT919302 | KT919303 |
| RVA/Human-wt/USA/VU12-13-127/2013/G12P[8] | KT919805 | KT919803 | KT919804 | KT919800 | KT919801 | KT919802 | KT919795 | KT919796 | KT919797 | KT919798 | KT919799 |
| RVA/Human-wt/USA/VU12-13-128/2013/G12P[8] | KT918704 | KT918702 | KT918703 | KT918699 | KT918700 | KT918701 | KT918694 | KT918695 | KT918696 | KT918697 | KT918698 |
| RVA/Human-wt/USA/VU12-13-129/2013/G12P[8] | KT919937 | KT919935 | KT919936 | KT919932 | KT919933 | KT919934 | KT919927 | KT919928 | KT919929 | KT919930 | KT919931 |
| RVA/Human-wt/USA/VU12-13-130/2013/G12P[8] | KT919695 | KT919693 | KT919694 | KT919690 | KT919691 | KT919692 | KT919685 | KT919686 | KT919687 | KT919688 | KT919689 |
| RVA/Human-wt/USA/VU12-13-132/2013/G12P[8] | KT919728 | KT919726 | KT919727 | KT919723 | KT919724 | KT919725 | KT919718 | KT919719 | KT919720 | KT919721 | KT919722 |
| RVA/Human-wt/USA/VU12-13-133/2013/G12P[8] | KT919706 | KT919704 | KT919705 | KT919701 | KT919702 | KT919703 | KT919696 | KT919697 | KT919698 | KT919699 | KT919700 |
| RVA/Human-wt/USA/VU12-13-134/2013/G12P[8] | KT919882 | KT919880 | KT919881 | KT919877 | KT919878 | KT919879 | KT919872 | KT919873 | KT919874 | KT919875 | KT919876 |
| RVA/Human-wt/USA/VU12-13-135/2013/G12P[8] | KT918418 | KT918416 | KT918417 | KT918413 | KT918414 | KT918415 | KT918408 | KT918409 | KT918410 | KT918411 | KT918412 |
| RVA/Human-wt/USA/VU12-13-136/2013/G12P[8] | KT919959 | KT919957 | KT919958 | KT919954 | KT919955 | KT919956 | KT919949 | KT919950 | KT919951 | KT919952 | KT919953 |
| RVA/Human-wt/USA/VU12-13-137/2013/G12P[8] | KT918880 | KT918878 | KT918879 | KT918875 | KT918876 | KT918877 | KT918870 | KT918871 | KT918872 | KT918873 | KT918874 |
| RVA/Human-wt/USA/VU12-13-138/2013/G12P[8] | KT919651 | KT919649 | KT919650 | KT919646 | KT919647 | KT919648 | KT919641 | KT919642 | KT919643 | KT919644 | KT919645 |
| RVA/Human-wt/USA/VU12-13-139/2013/G12P[8] | KT918979 | KT918977 | KT918978 | KT918974 | KT918975 | KT918976 | KT918969 | KT918970 | KT918971 | KT918972 | KT918973 |
| RVA/Human-wt/USA/VU12-13-141/2013/G12P[8] | KT918715 | KT918713 | KT918714 | KT918710 | KT918711 | KT918712 | KT918705 | KT918706 | KT918707 | KT918708 | KT918709 |
| RVA/Human-wt/USA/VU12-13-142/2013/G12P[8] | KT918660 | KT918658 | KT918659 | KT918655 | KT918656 | KT918657 | KT918650 | KT918651 | KT918652 | KT918653 | KT918654 |
| RVA/Human-wt/USA/VU12-13-143/2013/G12P[8] | KT919519 | KT919517 | KT919518 | KT919514 | KT919515 | KT919516 | KT919509 | KT919510 | KT919511 | KT919512 | KT919513 |
| RVA/Human-wt/USA/VU12-13-144/2013/G12P[8] | KT919629 | KT919627 | KT919628 | KT919624 | KT919625 | KT919626 | KT919619 | KT919620 | KT919621 | KT919622 | KT919623 |
| RVA/Human-wt/USA/VU12-13-145/2013/G2P[4]  | KT918451 | KT918449 | KT918450 | KT918446 | KT918447 | KT918448 | KT918441 | KT918442 | KT918443 | KT918444 | KT918445 |
| RVA/Human-wt/USA/VU12-13-146/2013/G12P[8] | KT919276 | KT919274 | KT919275 | KT919271 | KT919272 | KT919273 | KT919266 | KT919267 | KT919268 | KT919269 | KT919270 |
| RVA/Human-wt/USA/VU12-13-147/2013/G12P[8] | KT919915 | KT919913 | KT919914 | KT919910 | KT919911 | KT919912 | KT919905 | KT919906 | KT919907 | KT919908 | KT919909 |
| RVA/Human-wt/USA/VU12-13-148/2013/G12P[8] | KT919893 | KT919891 | KT919892 | KT919888 | KT919889 | KT919890 | KT919883 | KT919884 | KT919885 | KT919886 | KT919887 |
| RVA/Human-wt/USA/VU12-13-149/2013/G12P[8] | KT919045 | KT919043 | KT919044 | KT919040 | KT919041 | KT919042 | KT919035 | KT919036 | KT919037 | KT919038 | KT919039 |
| RVA/Human-wt/USA/VU12-13-150/2013/G12P[8] | KT919243 | KT919241 | KT919242 | KT919238 | KT919239 | KT919240 | KT919233 | KT919234 | KT919235 | KT919236 | KT919237 |
| RVA/Human-wt/USA/VU12-13-151/2013/G12P[8] | KT919056 | KT919054 | KT919055 | KT919051 | KT919052 | KT919053 | KT919046 | KT919047 | KT919048 | KT919049 | KT919050 |
| RVA/Human-wt/USA/VU12-13-152/2013/G12P[8] | KT919210 | KT919208 | KT919209 | KT919205 | KT919206 | KT919207 | KT919200 | KT919201 | KT919202 | KT919203 | KT919204 |
| RVA/Human-wt/USA/VU12-13-153/2013/G12P[8] | KT919419 | KT919417 | KT919418 | KT919414 | KT919415 | KT919416 | KT919409 | KT919410 | KT919411 | KT919412 | KT919413 |
| RVA/Human-wt/USA/VU12-13-162/2013/G1P[8]  | KT919122 | KT919120 | KT919121 | KT919117 | KT919118 | KT919119 | KT919112 | KT919113 | KT919114 | KT919115 | KT919116 |
| RVA/Human-wt/USA/VU12-13-176/2013/G12P[8] | KT919452 | KT919450 | KT919451 | KT919447 | KT919448 | KT919449 | KT919442 | KT919443 | KT919444 | KT919445 | KT919446 |
| RVA/Human-wt/USA/VU12-13-180/2013/G12P[8] | KT918517 | KT918515 | KT918516 | KT918512 | KT918513 | KT918514 | KT918507 | KT918508 | KT918509 | KT918510 | KT918511 |
| RVA/Human-wt/USA/VU12-13-182/2013/G12P[8] | KT919100 | KT919098 | KT919099 | KT919095 | KT919096 | KT919097 | KT919090 | KT919091 | KT919092 | KT919093 | KT919094 |
| RVA/Human-wt/USA/VU12-13-183/2013/G12P[8] | KT919199 | KT919197 | KT919198 | KT919194 | KT919195 | KT919196 | KT919189 | KT919190 | KT919191 | KT919192 | KT919193 |
| RVA/Human-wt/USA/VU12-13-196/2013/G12P[8] | KT919287 | KT919285 | KT919286 | KT919282 | KT919283 | KT919284 | KT919277 | KT919278 | KT919279 | KT919280 | KT919281 |
| RVA/Human-wt/USA/VU12-13-197/2013/G12P[8] | KT919585 | KT919583 | KT919584 | KT919580 | KT919581 | KT919582 | KT919575 | KT919576 | KT919577 | KT919578 | KT919579 |
| RVA/Human-wt/USA/VU12-13-198/2013/G12P[8] | KT919111 | KT919109 | KT919110 | KT919106 | KT919107 | KT919108 | KT919101 | KT919102 | KT919103 | KT919104 | KT919105 |
| RVA/Human-wt/USA/VU12-13-199/2013/G12P[8] | KT918957 | KT918955 | KT918956 | KT918952 | KT918953 | KT918954 | KT918947 | KT918948 | KT918949 | KT918950 | KT918951 |
| RVA/Human-wt/USA/VU12-13-200/2013/G12P[8] | KT919133 | KT919131 | KT919132 | KT919128 | KT919129 | KT919130 | KT919123 | KT919124 | KT919125 | KT919126 | KT919127 |
| RVA/Human-wt/USA/VU12-13-201/2013/G12P[8] | KT919089 | KT919087 | KT919088 | KT919084 | KT919085 | KT919086 | KT919079 | KT919080 | KT919081 | KT919082 | KT919083 |
| RVA/Human-wt/USA/VU12-13-202/2013/G12P[8] | KT919441 | KT919439 | KT919440 | KT919436 | KT919437 | KT919438 | KT919431 | KT919432 | KT919433 | KT919434 | KT919435 |
| RVA/Human-wt/USA/VU12-13-203/2013/G12P[8] | KT918550 | KT918548 | KT918549 | KT918545 | KT918546 | KT918547 | KT918540 | KT918541 | KT918542 | KT918543 | KT918544 |
| RVA/Human-wt/USA/VU12-13-204/2013/G12P[8] | KT918726 | KT918724 | KT918725 | KT918721 | KT918722 | KT918723 | KT918716 | KT918717 | KT918718 | KT918719 | KT918720 |
| RVA/Human-wt/USA/VU12-13-205/2013/G12P[8] | KT918858 | KT918856 | KT918857 | KT918853 | KT918854 | KT918855 | KT918848 | KT918849 | KT918850 | KT918851 | KT918852 |

## B. Sequences from previous studies

| Strain name                             | Encoded protein (genome segment) |          |          |          |          |          |          |          |            |           |             |
|-----------------------------------------|----------------------------------|----------|----------|----------|----------|----------|----------|----------|------------|-----------|-------------|
|                                         | VP7 (9)                          | VP4 (4)  | VP6 (6)  | VP1 (1)  | VP2 (2)  | VP3 (3)  | NSP1 (5) | NSP2 (8) | NSP3 (7)   | NSP4 (10) | NSP5/6 (11) |
| RVA/human-wt/USA/VU05-06-2/2005/G1P[8]  | JF490561                         | JF490564 | JF490563 | JF490556 | JF490566 | JF490565 | JF490558 | JF490557 | JF490562   | JF490560  | JF490559    |
| RVA/human-wt/USA/VU05-06-9/2005/G1P[8]  | JF490577                         | JF490573 | JF490572 | JF490567 | JF490576 | JF490575 | JF490574 | JF490568 | JF490571   | JF490570  | JF490569    |
| RVA/human-wt/USA/VU05-06-13/2005/G1P[8] | JF490582                         | JF490585 | JF490584 | JF490578 | JF490588 | JF490587 | JF490586 | JF490579 | JF490583   | JF490581  | JF490580    |
| RVA/human-wt/USA/VU05-06-15/2005/G1P[8] | JF490599                         | JF490595 | JF490594 | JF490589 | JF490598 | JF490597 | JF490596 | JF490590 | JF490593   | JF490592  | JF490591    |
| RVA/human-wt/USA/VU05-06-16/2005/G1P[8] | JF490608                         | JF490606 | JF490605 | JF490600 | JF490610 | JF490609 | JF490607 | JF490601 | JF490604   | JF490603  | JF490602    |
| RVA/human-wt/USA/VU05-06-17/2005/G1P[8] | JF490619                         | JF490616 | JF490615 | JF490611 | JF490620 | JF490621 | JF490618 | JF490617 | JF490614   | JF490613  | JF490612    |
| RVA/human-wt/USA/VU05-06-19/2005/G1P[8] | JF490627                         | JF490630 | JF490629 | JF490622 | JF490632 | JF490631 | JF490624 | JF490623 | JF490628   | JF490626  | JF490625    |
| RVA/human-wt/USA/VU05-06-20/2005/G1P[8] | JF490638                         | JF490641 | JF490640 | JF490633 | JF490643 | JF490642 | JF490635 | JF490634 | JF490639   | JF490637  | JF490636    |
| RVA/human-wt/USA/VU05-06-23/2005/G1P[8] | JF490648                         | JF490651 | JF490650 | JF490644 | JF490653 | JF490652 | JF490654 | JF490645 | JF490649   | JF490647  | JF490646    |
| RVA/human-wt/USA/VU05-06-26/2005/G1P[8] | JF490659                         | JF490663 | JF490661 | JF490655 | JF490665 | JF490664 | JF490662 | JF490656 | JF490660   | JF490658  | JF490657    |
| RVA/human-wt/USA/VU05-06-27/2005/G1P[8] | JF490671                         | JF490674 | JF490673 | JF490666 | JF490676 | JF490675 | JF490668 | JF490667 | JF490672</ |           |             |



|                                          |          |          |          |          |          |          |          |          |          |          |          |
|------------------------------------------|----------|----------|----------|----------|----------|----------|----------|----------|----------|----------|----------|
| RVA/human-wt/USA/VU05-06-70/2005/G1P[8]  | JF490812 | JF490815 | JF490814 | JF490817 | JF490816 | JF490819 | JF490818 | JF490809 | JF490813 | JF490811 | JF490810 |
| RVA/human-wt/USA/VU05-06-72/2005/G12P[8] | JF790296 | JF790298 | JF790293 | JF790288 | JF790295 | JF790294 | JF790297 | JF790289 | JF790292 | JF790291 | JF790290 |
| RVA/human-wt/USA/VU05-06-73/2005/G1P[8]  | JF490824 | JF490827 | JF490826 | JF490820 | JF490829 | JF490828 | JF490830 | JF490821 | JF490825 | JF490823 | JF490822 |
| RVA/human-wt/USA/VU05-06-74/2005/G12P[8] | JF790307 | JF790309 | JF790304 | JF790299 | JF790306 | JF790305 | JF790308 | JF790300 | JF790303 | JF790302 | JF790301 |
| RVA/human-wt/USA/VU05-06-76/2005/G1P[8]  | JF490836 | JF490839 | JF490838 | JF490831 | JF490841 | JF490840 | JF490833 | JF490832 | JF490837 | JF490835 | JF490834 |
| RVA/human-wt/USA/VU06-07-1/2006/G1P[8]   | JF490883 | JF490882 | JF490881 | JF490875 | JF490885 | JF490884 | JF490877 | JF490876 | JF490880 | JF490879 | JF490878 |
| RVA/human-wt/USA/VU06-07-7/2006/G1P[8]   | JF490896 | JF490894 | JF490893 | JF490886 | JF490896 | JF490895 | JF490888 | JF490887 | JF490891 | JF490890 | JF490889 |
| RVA/human-wt/USA/VU06-07-10/2006/G1P[8]  | JF490905 | JF490904 | JF490903 | JF490897 | JF490906 | JF490907 | JF490899 | JF490898 | JF490902 | JF490901 | JF490900 |
| RVA/human-wt/USA/VU06-07-21/2006/G3P[8]  | JF490913 | JF490916 | JF490915 | JF490908 | JF490918 | JF490917 | JF490910 | JF490909 | JF490914 | JF490912 | JF490911 |
| RVA/human-wt/USA/VU06-07-27/2006/G1P[8]  | JF490923 | JF490926 | JF490925 | JF490919 | JF490928 | JF490927 | JF490929 | JF490920 | JF490924 | JF490922 | JF490921 |
| RVA/human-wt/USA/VU06-07-29/2006/G1P[8]  | JF490847 | JF490850 | JF490849 | JF490842 | JF490852 | JF490851 | JF490844 | JF490843 | JF490848 | JF490846 | JF490845 |
| RVA/human-wt/USA/VU06-07-30/2006/G1P[8]  | JF490857 | JF490861 | JF490859 | JF490860 | JF490863 | JF490862 | JF490854 | JF490853 | JF490858 | JF490856 | JF490855 |
| RVA/human-wt/USA/VU06-07-31/2006/G1P[8]  | JF490869 | JF490872 | JF490871 | JF490864 | JF490874 | JF490873 | JF490866 | JF490865 | JF490870 | JF490868 | JF490867 |
| RVA/human-wt/USA/VU06-07-32/2006/G1P[8]  | JF490935 | JF490938 | JF490937 | JF490930 | JF490940 | JF490939 | JF490932 | JF490931 | JF490936 | JF490934 | JF490933 |
| RVA/human-wt/USA/VU06-07-33/2006/G1P[8]  | JF490946 | JF490950 | JF490948 | JF490941 | JF490949 | JF490951 | JF490943 | JF490942 | JF490947 | JF490945 | JF490944 |
| RVA/human-wt/USA/VU06-07-35/2006/G1P[8]  | JF490960 | JF490957 | JF490956 | JF490958 | JF490962 | JF490961 | JF490959 | JF490952 | JF490955 | JF490954 | JF490953 |
| RVA/human-wt/USA/VU08-09-5/2008/G3P[8]   | JF490968 | JF490971 | JF490970 | JF490963 | JF490973 | JF490972 | JF490965 | JF490964 | JF490969 | JF490967 | JF490966 |
| RVA/human-wt/USA/VU08-09-6/2008/G12P[8]  | JF490979 | JF490982 | JF490981 | JF490974 | JF490983 | JF490984 | JF490976 | JF490975 | JF490980 | JF490978 | JF490977 |
| RVA/human-wt/USA/VU08-09-7/2008/G3P[8]   | JF490990 | JF490993 | JF490992 | JF490985 | JF490995 | JF490994 | JF490987 | JF490986 | JF490991 | JF490989 | JF490988 |
| RVA/human-wt/USA/VU08-09-9/2008/G3P[8]   | JF491001 | JF491004 | JF491003 | JF490996 | JF491006 | JF491005 | JF490998 | JF490997 | JF491002 | JF491000 | JF490999 |
| RVA/human-wt/USA/VU08-09-12/2008/G3P[8]  | JF491012 | JF491015 | JF491014 | JF491007 | JF491017 | JF491016 | JF491009 | JF491008 | JF491013 | JF491011 | JF491010 |
| RVA/human-wt/USA/VU08-09-16/2008/G3P[8]  | JF790316 | JF790317 | JF790314 | JF790315 | JF790319 | JF790318 | JF790320 | JF790310 | JF790313 | JF790312 | JF790311 |
| RVA/human-wt/USA/VU08-09-17/2008/G3P[8]  | JF491025 | JF491023 | JF491022 | JF491024 | JF491028 | JF491026 | JF491027 | JF491018 | JF491021 | JF491020 | JF491019 |
| RVA/human-wt/USA/VU08-09-19/2008/G3P[8]  | JF491039 | JF491035 | JF491034 | JF491038 | JF491037 | JF491036 | JF491030 | JF491029 | JF491033 | JF491032 | JF491031 |
| RVA/human-wt/USA/VU08-09-20/2008/G3P[8]  | JF790331 | JF790327 | JF790325 | JF790326 | JF790330 | JF790328 | JF790329 | JF790321 | JF790324 | JF790323 | JF790322 |
| RVA/human-wt/USA/VU08-09-21/2008/G3P[8]  | JF491047 | JF491048 | JF491044 | JF491046 | JF491045 | JF491049 | JF491050 | JF491040 | JF491043 | JF491042 | JF491041 |
| RVA/human-wt/USA/VU08-09-22/2008/G3P[8]  | JF491055 | JF491058 | JF491057 | JF491060 | JF491061 | JF491059 | JF491052 | JF491051 | JF491056 | JF491054 | JF491053 |
| RVA/human-wt/USA/VU08-09-24/2008/G3P[8]  | JF491066 | JF491069 | JF491068 | JF491071 | JF491072 | JF491070 | JF491063 | JF491062 | JF491067 | JF491065 | JF491064 |
| RVA/human-wt/USA/VU08-09-25/2008/G3P[8]  | JF491077 | JF491080 | JF491079 | JF491083 | JF491082 | JF491081 | JF491074 | JF491073 | JF491078 | JF491076 | JF491075 |
| RVA/human-wt/USA/VU08-09-26/2008/G3P[8]  | JF491089 | JF491092 | JF491091 | JF491084 | JF491094 | JF491093 | JF491086 | JF491085 | JF491090 | JF491088 | JF491087 |
| RVA/human-wt/USA/VU08-09-27/2008/G3P[8]  | JF790342 | JF790335 | JF790334 | JF790332 | JF790337 | JF790336 | JF790339 | JF790338 | JF790341 | JF790340 | JF790333 |
| RVA/human-wt/USA/VU08-09-28/2008/G3P[8]  | JF491105 | JF491101 | JF491100 | JF491095 | JF491103 | JF491102 | JF491104 | JF491096 | JF491099 | JF491098 | JF491097 |
| RVA/human-wt/USA/VU08-09-29/2008/G3P[8]  | JF491115 | JF491111 | JF491116 | JF491114 | JF491113 | JF491112 | JF491107 | JF491106 | JF491110 | JF491109 | JF491108 |
| RVA/human-wt/USA/VU08-09-30/2008/G3P[8]  | JF491122 | JF491125 | JF491124 | JF491117 | JF491127 | JF491126 | JF491119 | JF491118 | JF491123 | JF491121 | JF491120 |
| RVA/human-wt/USA/VU08-09-39/2008/G12P[8] | JF790346 | JF790352 | JF790348 | JF790349 | JF790350 | JF790351 | JF790343 | JF790347 | JF790347 | JF790345 | JF790344 |
| RVA/human-wt/USA/VU10-11-2/2011/G2P[4]   | KF716314 | KF716326 | KF716338 | KF716350 | KF716362 | KF716374 | KF716386 | KF716398 | KF716410 | KF716422 | KF716434 |
| RVA/human-wt/USA/VU10-11-5/2011/G2P[4]   | KF716318 | KF716330 | KF716342 | KF716354 | KF716366 | KF716378 | KF716390 | KF716402 | KF716414 | KF716426 | KF716438 |
| RVA/human-wt/USA/VU10-11-6/2011/G2P[4]   | KF716321 | KF716333 | KF716345 | KF716357 | KF716369 | KF716381 | KF716393 | KF716405 | KF716417 | KF716429 | KF716441 |
| RVA/human-wt/USA/VU10-11-8/2011/G2P[4]   | KF716316 | KF716328 | KF716340 | KF716352 | KF716364 | KF716376 | KF716388 | KF716400 | KF716412 | KF716424 | KF716436 |
| RVA/human-wt/USA/VU10-11-9/2011/G2P[4]   | KF716322 | KF716334 | KF716346 | KF716358 | KF716370 | KF716382 | KF716394 | KF716406 | KF716418 | KF716430 | KF716442 |
| RVA/human-wt/USA/VU10-11-10/2011/G2P[4]  | KF716315 | KF716327 | KF716339 | KF716351 | KF716363 | KF716375 | KF716387 | KF716399 | KF716411 | KF716423 | KF716435 |
| RVA/human-wt/USA/VU10-11-11/2011/G2P[4]  | KF716319 | KF716331 | KF716343 | KF716355 | KF716367 | KF716379 | KF716391 | KF716403 | KF716415 | KF716427 | KF716439 |
| RVA/human-wt/USA/VU10-11-19/2011/G2P[4]  | KF716324 | KF716336 | KF716348 | KF716360 | KF716372 | KF716384 | KF716396 | KF716408 | KF716420 | KF716432 | KF716444 |
| RVA/human-wt/USA/VU10-11-20/2011/G2P[4]  | KF716323 | KF716335 | KF716347 | KF716359 | KF716371 | KF716383 | KF716395 | KF716407 | KF716419 | KF716431 | KF716443 |
| RVA/human-wt/USA/VU10-11-21/2011/G2P[4]  | KF716313 | KF716325 | KF716337 | KF716349 | KF716361 | KF716373 | KF716385 | KF716397 | KF716409 | KF716421 | KF716433 |
| RVA/human-wt/USA/VU10-11-22/2011/G2P[4]  | KF716320 | KF716332 | KF716344 | KF716356 | KF716368 | KF716380 | KF716392 | KF716404 | KF716416 | KF716428 | KF716440 |
| RVA/human-wt/USA/VU10-11-24/2011/G2P[4]  | KF716317 | KF716329 | KF716341 | KF716353 | KF716365 | KF716377 | KF716389 | KF716401 | KF716413 | KF716425 | KF716437 |

Table S2. Complete allele-based genome constellations for VUMC NVSN rotaviruses 2005-2013

|             | G(VP7) | P(VP4) | VP6    | VP1  | VP2    | VP3    | NSP1 | NSP2   | NSP3   | NSP4 | NSP5 |
|-------------|--------|--------|--------|------|--------|--------|------|--------|--------|------|------|
| VU05-06-2   | G1     | P[8]   | Blue   | Red  | Orange | Red    | Red  | Red    | Red    | Blue | Red  |
| VU05-06-13  | G1     | P[8]   | Blue   | Red  | Orange | Red    | Red  | Red    | Red    | Blue | Red  |
| VU05-06-19  | G1     | P[8]   | Blue   | Red  | Orange | Red    | Red  | Red    | Red    | Blue | Red  |
| VU05-06-20  | G1     | P[8]   | Blue   | Red  | Orange | Red    | Red  | Red    | Red    | Blue | Red  |
| VU05-06-23  | G1     | P[8]   | Blue   | Red  | Orange | Red    | Red  | Red    | Red    | Blue | Red  |
| VU05-06-28  | G1     | P[8]   | Blue   | Red  | Orange | Red    | Red  | Red    | Red    | Blue | Red  |
| VU05-06-33  | G1     | P[8]   | Blue   | Red  | Orange | Red    | Red  | Red    | Red    | Blue | Red  |
| VU05-06-40  | G1     | P[8]   | Blue   | Red  | Orange | Red    | Red  | Red    | Red    | Blue | Red  |
| VU05-06-48  | G1     | P[8]   | Blue   | Red  | Orange | Red    | Red  | Red    | Red    | Blue | Red  |
| VU05-06-59  | G1     | P[8]   | Blue   | Red  | Orange | Red    | Red  | Red    | Red    | Blue | Red  |
| VU05-06-67  | G1     | P[8]   | Blue   | Red  | Orange | Red    | Red  | Red    | Red    | Blue | Red  |
| VU05-06-70  | G1     | P[8]   | Blue   | Red  | Orange | Red    | Red  | Red    | Red    | Blue | Red  |
| VU05-06-73  | G1     | P[8]   | Blue   | Red  | Orange | Red    | Red  | Red    | Red    | Blue | Red  |
| VU05-06-9   | G1     | P[8]   | Blue   | Red  | Orange | Red    | Red  | Red    | Red    | Blue | Red  |
| VU05-06-46  | G1     | P[8]   | Blue   | Red  | Orange | Red    | Red  | Red    | Red    | Blue | Red  |
| VU05-06-57  | G1     | P[8]   | Blue   | Red  | Orange | Red    | Red  | Red    | Red    | Blue | Red  |
| VU05-06-17  | G1     | P[8]   | Orange | Red  | Pink   | Red    | Red  | Red    | Red    | Blue | Red  |
| VU05-06-47  | G1     | P[8]   | Orange | Red  | Pink   | Blue   | Red  | Blue   | Blue   | Red  | Red  |
| VU05-06-16  | G1     | P[8]   | Orange | Red  | Pink   | Blue   | Red  | Blue   | Blue   | Red  | Red  |
| VU05-06-62  | G1     | P[8]   | Orange | Red  | Pink   | Blue   | Red  | Blue   | Blue   | Red  | Red  |
| VU05-06-15  | G1     | P[8]   | Orange | Red  | Pink   | Blue   | Red  | Orange | Blue   | Red  | Blue |
| VU06-07-1   | G1     | P[8]   | Orange | Red  | Pink   | Blue   | Red  | Orange | Blue   | Red  | Blue |
| VU06-07-10  | G1     | P[8]   | Orange | Red  | Pink   | Blue   | Red  | Orange | Blue   | Red  | Blue |
| VU05-06-69  | G1     | P[8]   | Pink   | Red  | Red    | Orange | Red  | Red    | Red    | Red  | Red  |
| VU06-07-7   | G1     | P[8]   | Pink   | Red  | Red    | Orange | Red  | Red    | Red    | Red  | Red  |
| VU06-07-35  | G1     | P[8]   | Pink   | Red  | Red    | Orange | Red  | Red    | Red    | Red  | Red  |
| VU06-07-29  | G1     | P[8]   | Blue   | Blue | Blue   | Blue   | Red  | Orange | Blue   | Blue | Blue |
| VU05-06-43  | G1     | P[8]   | Blue   | Blue | Blue   | Blue   | Red  | Orange | Blue   | Blue | Blue |
| VU06-07-30  | G1     | P[8]   | Blue   | Blue | Blue   | Blue   | Red  | Orange | Blue   | Blue | Blue |
| VU05-06-76  | G1     | P[8]   | Blue   | Blue | Blue   | Blue   | Blue | Orange | Yellow | Blue | Blue |
| VU06-07-31  | G1     | P[8]   | Blue   | Blue | Blue   | Blue   | Blue | Orange | Yellow | Blue | Blue |
| VU06-07-33  | G1     | P[8]   | Blue   | Blue | Blue   | Blue   | Blue | Orange | Yellow | Blue | Blue |
| VU05-06-26  | G1     | P[8]   | Blue   | Blue | Blue   | Blue   | Blue | Orange | Yellow | Blue | Blue |
| VU05-06-27  | G1     | P[8]   | Blue   | Blue | Blue   | Blue   | Blue | Orange | Yellow | Blue | Blue |
| VU06-07-32  | G1     | P[8]   | Blue   | Red  | Blue   | Red    | Red  | Red    | Red    | Red  | Red  |
| VU12-13-162 | G1     | P[8]   | Blue   | Blue | Blue   | Red    | Red  | Red    | Black  | Blue | Red  |
| VU06-07-27  | G1     | P[8]   | Pink   | Red  | Red    | Red    | Blue | Red    | Yellow | Red  | Red  |
| VU06-07-21  | G3     | P[8]   | Yellow | Red  | Yellow | Red    | Blue | Red    | Red    | Red  | Red  |
| VU08-09-24  | G3     | P[8]   | Yellow | Red  | Yellow | Red    | Blue | Red    | Red    | Red  | Red  |
| VU08-09-5   | G3     | P[8]   | Yellow | Red  | Yellow | Red    | Blue | Red    | Red    | Red  | Red  |
| VU08-09-7   | G3     | P[8]   | Yellow | Red  | Yellow | Red    | Blue | Red    | Red    | Red  | Red  |
| VU08-09-9   | G3     | P[8]   | Yellow | Red  | Yellow | Red    | Blue | Red    | Red    | Red  | Red  |
| VU08-09-12  | G3     | P[8]   | Yellow | Red  | Yellow | Red    | Blue | Red    | Red    | Red  | Red  |
| VU08-09-16  | G3     | P[8]   | Yellow | Red  | Yellow | Red    | Blue | Red    | Red    | Red  | Red  |
| VU08-09-17  | G3     | P[8]   | Yellow | Red  | Yellow | Red    | Blue | Red    | Red    | Red  | Red  |
| VU08-09-19  | G3     | P[8]   | Yellow | Red  | Yellow | Red    | Blue | Red    | Red    | Red  | Red  |
| VU08-09-20  | G3     | P[8]   | Yellow | Red  | Yellow | Red    | Blue | Red    | Red    | Red  | Red  |
| VU08-09-21  | G3     | P[8]   | Yellow | Red  | Yellow | Red    | Blue | Red    | Red    | Red  | Red  |
| VU08-09-25  | G3     | P[8]   | Yellow | Red  | Yellow | Red    | Blue | Red    | Red    | Red  | Red  |
| VU08-09-26  | G3     | P[8]   | Yellow | Red  | Yellow | Red    | Blue | Red    | Red    | Red  | Red  |
| VU08-09-27  | G3     | P[8]   | Yellow | Red  | Yellow | Red    | Blue | Red    | Red    | Red  | Red  |
| VU08-09-28  | G3     | P[8]   | Yellow | Red  | Yellow | Red    | Blue | Red    | Red    | Red  | Red  |
| VU08-09-29  | G3     | P[8]   | Yellow | Red  | Yellow | Red    | Blue | Red    | Red    | Red  | Red  |
| VU08-09-30  | G3     | P[8]   | Yellow | Red  | Yellow | Red    | Blue | Red    | Red    | Red  | Red  |
| VU12-13-101 | G9     | P[8]   | Yellow | Red  | Yellow | Red    | Red  | Red    | Orange | Red  | Red  |
| VU11-12-60  | G3     | P[8]   | Orange | Red  | Yellow | Red    | Blue | Red    | Red    | Red  | Red  |
| VU08-09-22  | G3     | P[8]   | Orange | Red  | Yellow | Red    | Red  | Red    | Orange | Red  | Red  |
